# Supplementary material for: Effect of Pit Mud on Bacterial Community and Aroma Components in Yellow Water and Their Changes during the Fermentation of Chinese Strong-Flavor Liquor
Source: MDPI journal article supplement (doi:10.3390/foods9030372), 2020-03-23
Supplement: s1 [file s1]

1 **Supplemental Data**

2 **Table S1. Acidity and pH of yellow water**

| samples                            | HS30       | HS45       | HS60       |
|------------------------------------|------------|------------|------------|
| pH                                 | 3.60±0.005 | 3.55±0.008 | 3.44±0.005 |
| acidity(mL Standard NaOH solution) | 6.07±0.062 | 5.90±0.093 | 6.70±0.061 |

3 All data are presented as means±standard deviations (n=3). HS30: yellow water at 30th  
 4 day, HS45: yellow water at 45th day, HS60: yellow water at 60th day. Standard NaOH  
 5 solution: 0.1 mol/L.

6

7

8 **Table S2. Aroma components of yellow water and pit mud**

| Aroma                    | HS30         | HS45         | HS60         | JN             |
|--------------------------|--------------|--------------|--------------|----------------|
| acetic acid(AA)(mg/L)    | 20.01±1.46   | 124.61±12.64 | 261.78±10.64 | 320.58±10.28   |
| butyric acid(BA)(mg/L)   | 27.38±1.68   | 65.54±4.98   | 126.89±4.57  | 510.24±14.22   |
| caproic acid(CA)(mg/L)   | 564.33±22.52 | 607.50±21.29 | 960.01±47.88 | 5050.93±402.30 |
| ethyl acetate(EA)(mg/L)  | 25.44±1.12   | 26.50±1.01   | 37.85±2.06   | 35.63±1.22     |
| ethyl lactate(EL)(mg/L)  | 25.43±0.81   | 82.73±3.44   | 181.16±6.58  | 231.38±12.98   |
| ethyl butyrate(EB)(mg/L) | 17.69±1.20   | 16.70±1.15   | 21.45±0.65   | 18.52±0.98     |
| ethyl caproate(EC)(mg/L) | 446.08±12.63 | 471.84±15.09 | 585.38±10.03 | 947.09±33.81   |

9 All data are presented as means±standard deviations (n=3), HS30: yellow water at  
 10 30th day, HS45: yellow water at 45th day, HS60: yellow water at 60th day, JN: pit  
 11 mud

12

13

14

15

16

17  
18  
19

Table S3. Sequence number and diversity indices calculated based on a cutoff of 97% similarity

| Sample | sequence number | Shannon | Chao1  |
|--------|-----------------|---------|--------|
| HS30_1 | 39550.00        | 1.31    | 345.78 |
| HS30_2 | 31572.00        | 1.26    | 389.11 |
| HS30_3 | 36633.00        | 1.36    | 353.55 |
| HS45_1 | 30381.00        | 1.09    | 341.68 |
| HS45_2 | 39559.00        | 2.50    | 413.67 |
| HS45_3 | 35917.00        | 2.03    | 360.65 |
| HS60_1 | 33765.00        | 2.93    | 447.07 |
| HS60_2 | 42335.00        | 2.59    | 430.41 |
| HS60_3 | 50601.00        | 2.22    | 378.69 |
| JN_1   | 40528.00        | 2.62    | 258.90 |
| JN_2   | 44369.00        | 3.09    | 308.65 |
| JN_3   | 52008.00        | 2.86    | 316.77 |

20 HS30: yellow water at 30th day, HS45: yellow water at 45th day, HS60: yellow water  
21 at 60th day, JN: pit mud

22  
23  
24

Table S4. Relative abundances of microbe communities in the pit mud and yellow water

| Phylum        | HS30   | HS45   | HS60   | JN     |
|---------------|--------|--------|--------|--------|
| Firmicutes    | 97.79% | 97.65% | 96.48% | 98.91% |
| Bacteroidetes | 0.67%  | 1.06%  | 1.40%  | 0.02%  |

25 HS30: yellow water at 30th day, HS45: yellow water at 45th day, HS60: yellow water  
26 at 60th day, JN: pit mud

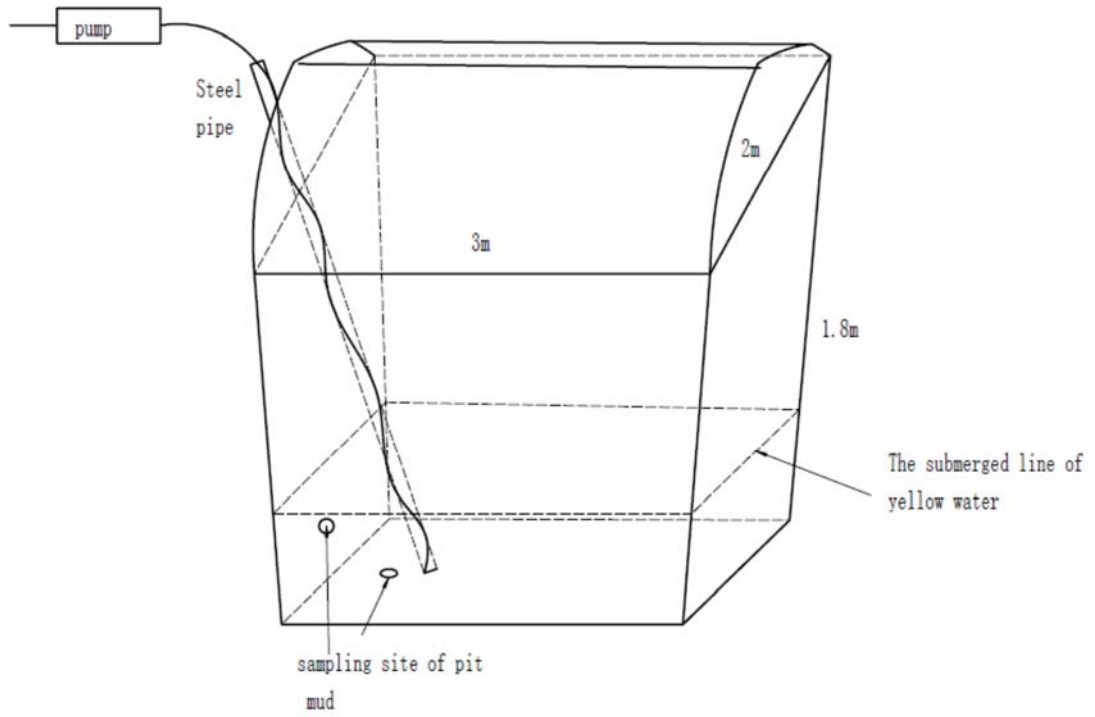

27

28

29

**Figure S1.** Sampling yellow water and the sample points of pit mud
